# Supplementary material
Source: MDPI journal article supplement (https://www.mdpi.com/2297-8739/5/1/12)
Supplement: s1 [file s1]

## Supplementary Materials

# Development and Validation of an HPLC-DAD Method for the Simultaneous Extraction and Quantification of Bisphenol-A, 4-Hydroxybenzoic Acid, 4-Hydroxyacetophenone and Hydroquinone in Bacterial Cultures of *Lactococcus lactis*

Angelos T. Rigopoulos<sup>1</sup>, Victoria F. Samanidou<sup>2</sup> and Maria Touraki<sup>1,\*</sup>

<sup>1</sup> Laboratory of General Biology, Division of Genetics, Development and Molecular Biology, Department of Biology, School of Sciences, Aristotle University of Thessaloniki (A.U.TH.), 54 124 Thessaloniki, Greece; angelos.rigopoulos@embl.de

<sup>2</sup> Laboratory of Analytical Chemistry, Department of Chemistry, School of Sciences, Aristotle University of Thessaloniki (A.U.TH.), 54 124 Thessaloniki, Greece; samanidu@chem.auth.gr

\* Correspondence: touraki@bio.auth.gr; Tel.: +30-231-099-8292

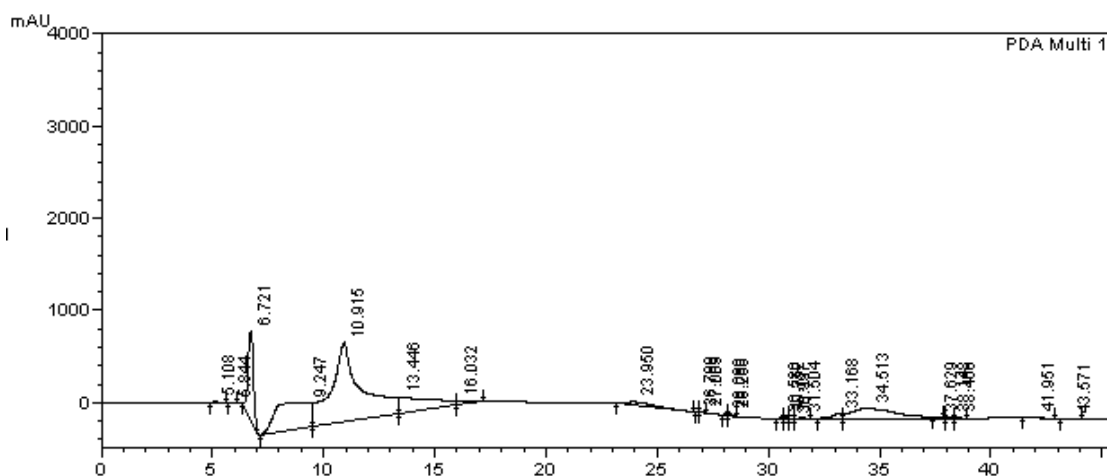

A

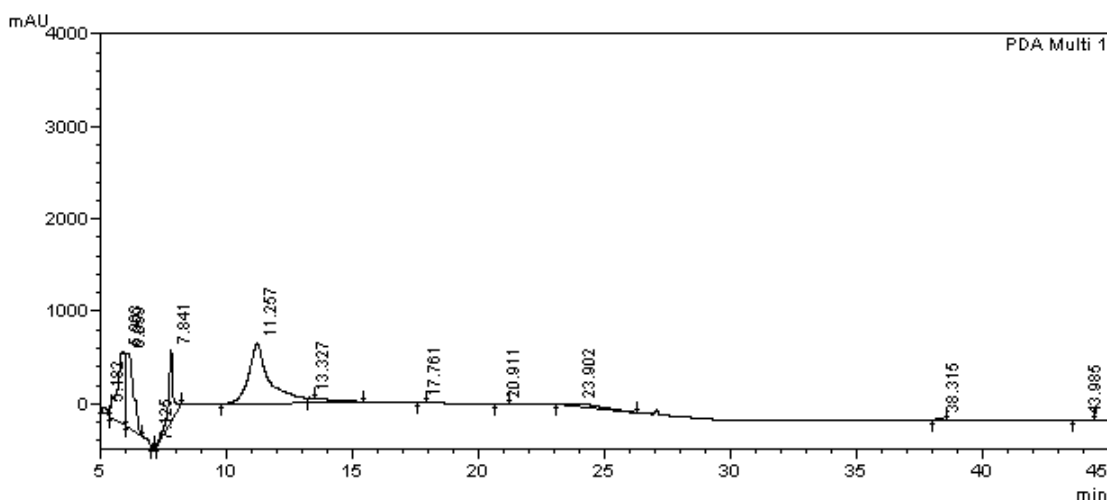

B

Figure S1. Blank chromatograms of *L. lactis* cells (A) and cell free bacterial medium (B).
